# Supplementary material
Source: ML conference proceedings conference paper supplement (https://openaccess.thecvf.com/content/cvpr_2015/html/Paikin_Solving_Multiple_Square_2015_CVPR_paper.html)
Supplement: Supplementary file 1 [file Paikin_Solving_Multiple_Square_2015_CVPR_supplemental.zip]

Archive with 3 entries (3 files):
- Supplementary - Missing.pdf
- Supplementary - Mixed.pdf
- Supplementary - Video.wmv
