# Supplementary material
Source: ML conference proceedings conference paper supplement (https://openaccess.thecvf.com/content/cvpr_2015/html/Paikin_Solving_Multiple_Square_2015_CVPR_paper.html)
Supplement: Supplementary file 1 [file Paikin_Solving_Multiple_Square_2015_CVPR_supplemental.zip › Supplementary - Missing.pdf]

# Solving Multiple Square Jigsaw Puzzles with Missing Pieces

## Supplementary Material - Puzzles With Missing Pieces

Genady Paikin  
Technion  
genadyp28@gmail.com

Ayellet Tal  
Technion  
ayellet@ee.technion.ac.il

### Puzzles of 432 Pieces, where about 5% of the pieces are missing

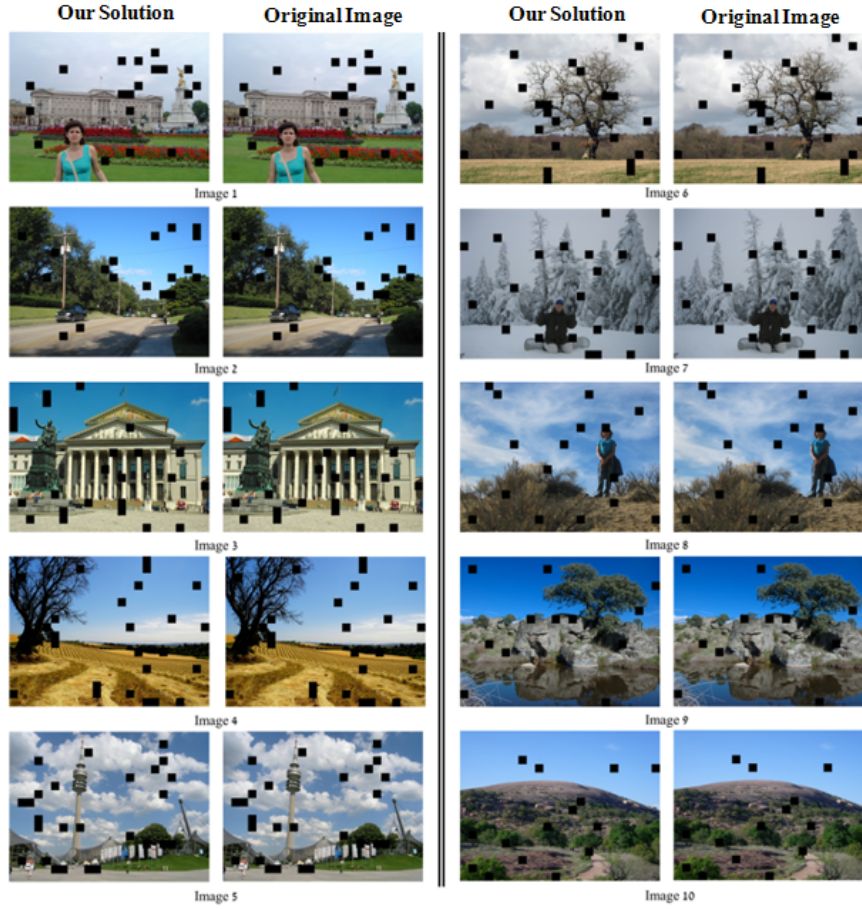

Figure 1. 10 puzzles out of 20 from the dataset of [5]

|         | Direct | Neighbor |          | Direct | Neighbor |
|---------|--------|----------|----------|--------|----------|
| Image 1 | 100%   | 100%     | Image 6  | 100%   | 100%     |
| Image 2 | 100%   | 100%     | Image 7  | 100%   | 100%     |
| Image 3 | 100%   | 100%     | Image 8  | 100%   | 100%     |
| Image 4 | 100%   | 100%     | Image 9  | 100%   | 100%     |
| Image 5 | 100%   | 100%     | Image 10 | 100%   | 100%     |

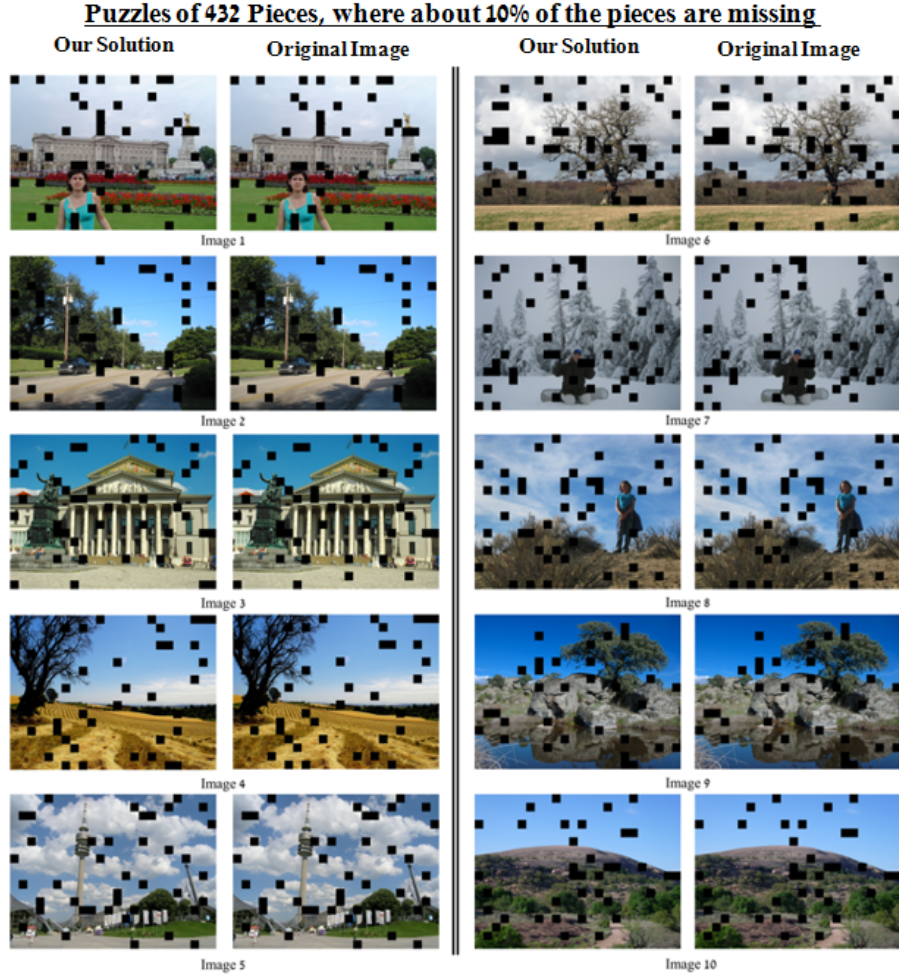

Figure 2. 10 puzzles out of 20 from the dataset of [5]

|         | Direct | Neighbor |          | Direct | Neighbor |
|---------|--------|----------|----------|--------|----------|
| Image 1 | 100%   | 100%     | Image 6  | 100%   | 100%     |
| Image 2 | 100%   | 100%     | Image 7  | 100%   | 100%     |
| Image 3 | 98.95% | 99.69%   | Image 8  | 100%   | 100%     |
| Image 4 | 99.23% | 99.4%    | Image 9  | 100%   | 100%     |
| Image 5 | 100%   | 100%     | Image 10 | 100%   | 100%     |

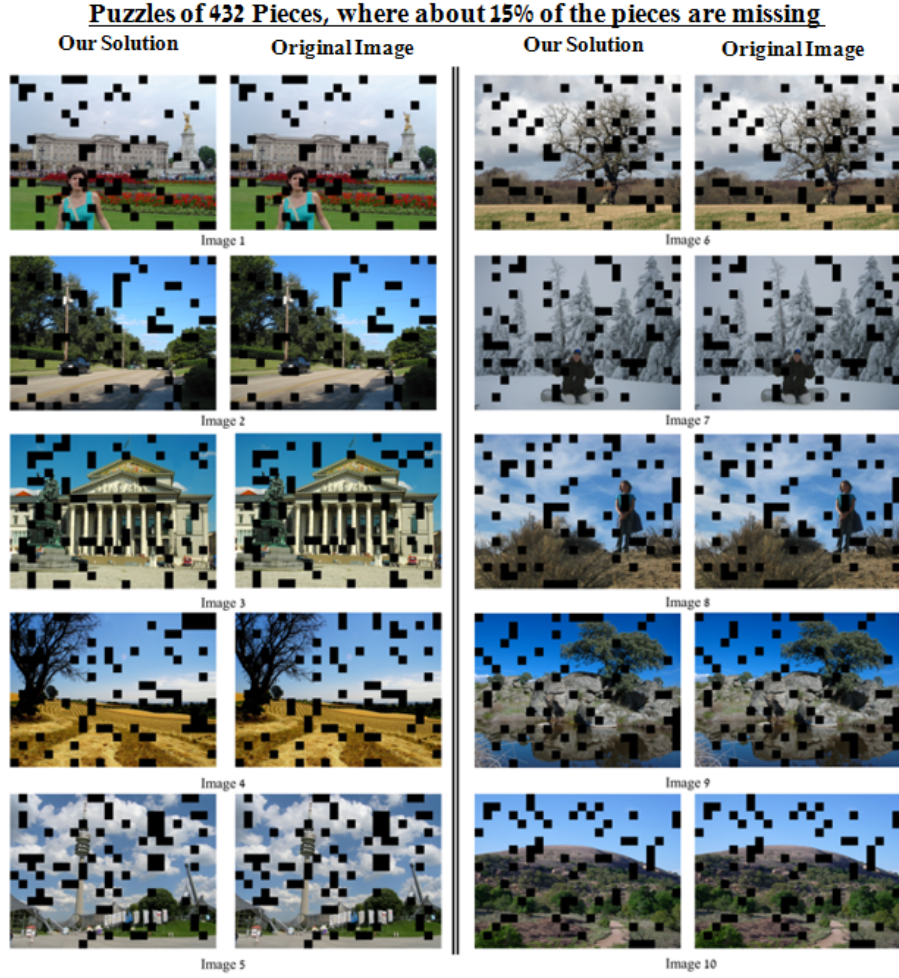

Figure 3. 10 puzzles out of 20 from the dataset of [5]

|         | Direct | Neighbor |          | Direct | Neighbor |
|---------|--------|----------|----------|--------|----------|
| Image 1 | 100%   | 100%     | Image 6  | 100%   | 100%     |
| Image 2 | 100%   | 100%     | Image 7  | 100%   | 100%     |
| Image 3 | 97.37% | 97.8%    | Image 8  | 100%   | 100%     |
| Image 4 | 97.85% | 97.7%    | Image 9  | 99.46% | 99.35%   |
| Image 5 | 100%   | 100%     | Image 10 | 100%   | 100%     |

**Puzzles of 540 Pieces, where about 5% of the pieces are missing**

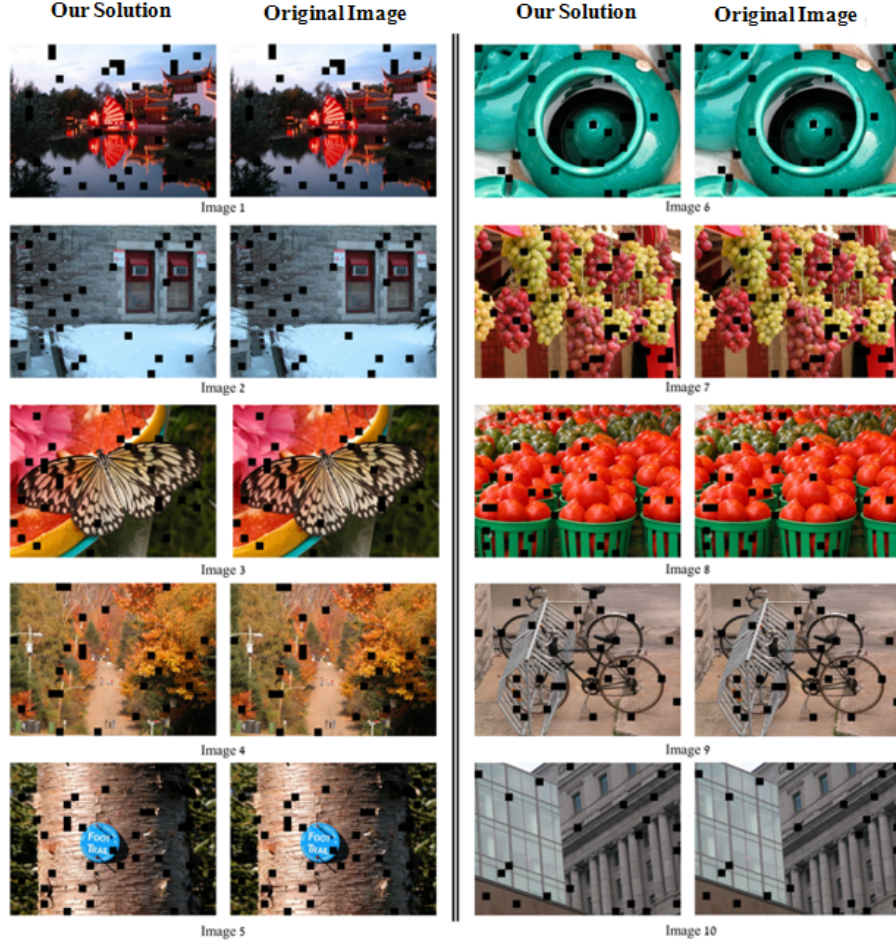

Figure 4. 10 puzzles out of 20 from the dataset of [17]

|         | Direct | Neighbor |          | Direct | Neighbor |
|---------|--------|----------|----------|--------|----------|
| Image 1 | 100%   | 100%     | Image 6  | 100%   | 100%     |
| Image 2 | 100%   | 100%     | Image 7  | 100%   | 100%     |
| Image 3 | 100%   | 100%     | Image 8  | 100%   | 100%     |
| Image 4 | 100%   | 100%     | Image 9  | 100%   | 100%     |
| Image 5 | 100%   | 100%     | Image 10 | 100%   | 100%     |

**Puzzles of 540 Pieces, where about 10% of the pieces are missing**

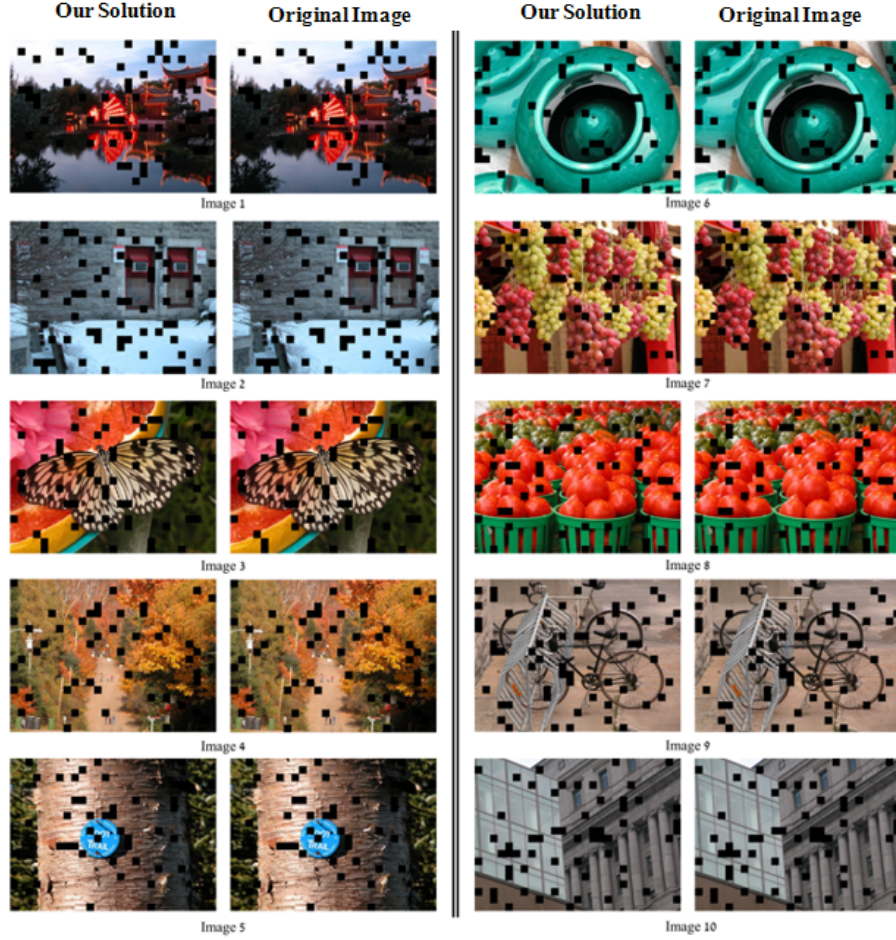

Figure 5. 10 puzzles out of 20 from the dataset of [17]

|         | Direct | Neighbor |          | Direct | Neighbor |
|---------|--------|----------|----------|--------|----------|
| Image 1 | 100%   | 100%     | Image 6  | 100%   | 100%     |
| Image 2 | 99.39% | 99.2%    | Image 7  | 100%   | 100%     |
| Image 3 | 100%   | 100%     | Image 8  | 100%   | 100%     |
| Image 4 | 100%   | 100%     | Image 9  | 100%   | 100%     |
| Image 5 | 100%   | 100%     | Image 10 | 100%   | 100%     |

**Puzzles of 540 Pieces, where about 15% of the pieces are missing**

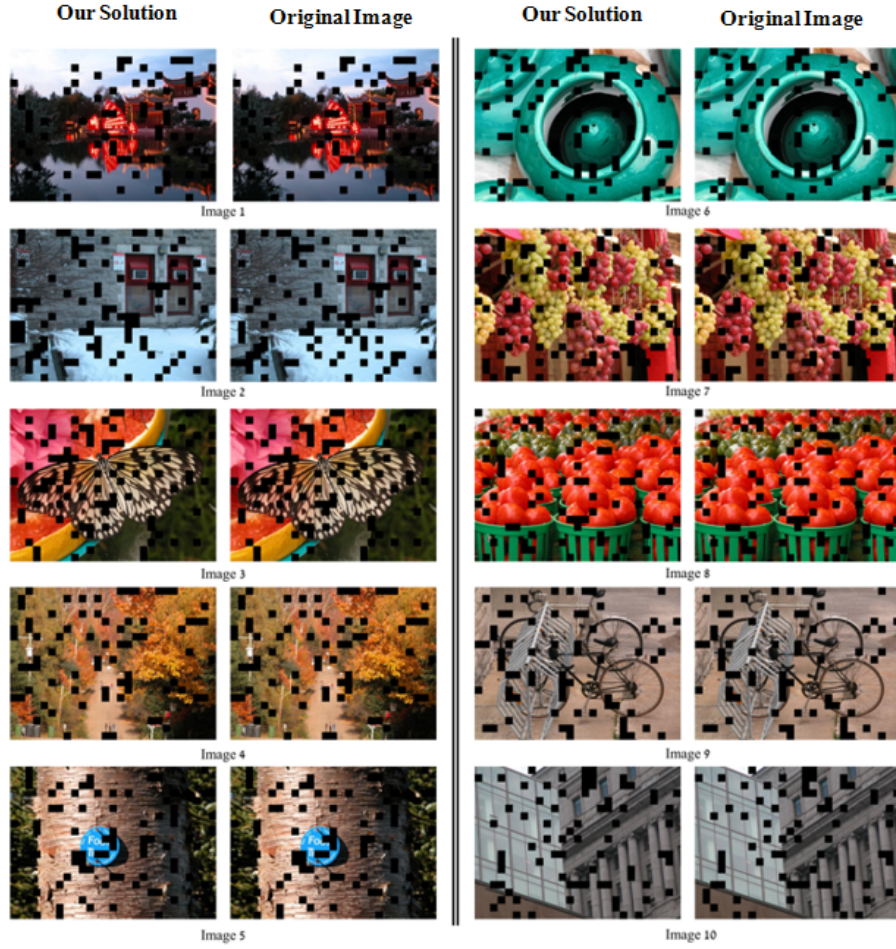

Figure 6. 10 puzzles out of 20 from the dataset of [17]

|         | Direct | Neighbor |          | Direct | Neighbor |
|---------|--------|----------|----------|--------|----------|
| Image 1 | 99.78% | 99.87%   | Image 6  | 100%   | 100%     |
| Image 2 | 96.86% | 97.31%   | Image 7  | 100%   | 100%     |
| Image 3 | 100%   | 100%     | Image 8  | 100%   | 100%     |
| Image 4 | 100%   | 100%     | Image 9  | 100%   | 100%     |
| Image 5 | 100%   | 100%     | Image 10 | 98.49% | 98.83%   |

**Puzzles of 805 Pieces, where about 5% of the pieces are missing**

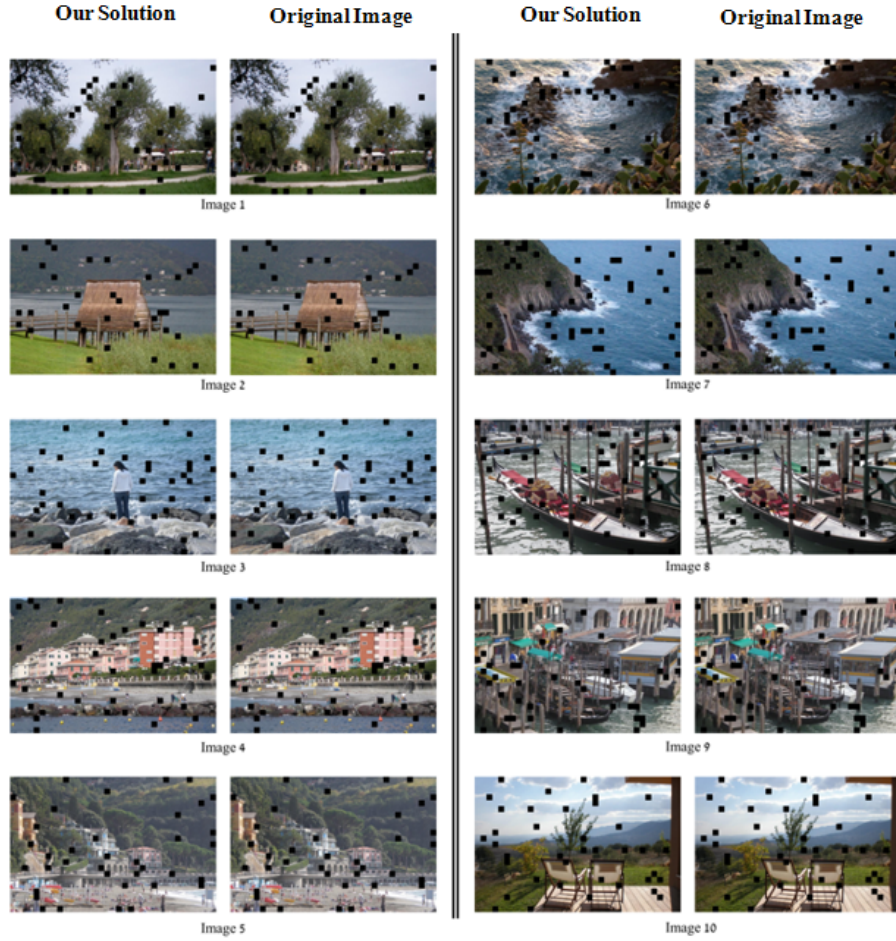

Figure 7. 10 puzzles out of 20 from the dataset of [17]

|          | Direct | Neighbor |          | Direct | Neighbor |
|----------|--------|----------|----------|--------|----------|
| Image 5  | 100%   | 100%     | Image 14 | 100%   | 100%     |
| Image 7  | 100%   | 100%     | Image 15 | 100%   | 100%     |
| Image 8  | 100%   | 100%     | Image 17 | 100%   | 100%     |
| Image 10 | 100%   | 100%     | Image 19 | 100%   | 100%     |
| Image 13 | 100%   | 100%     | Image 20 | 100%   | 100%     |

**Puzzles of 805 Pieces, where about 10% of the pieces are missing**

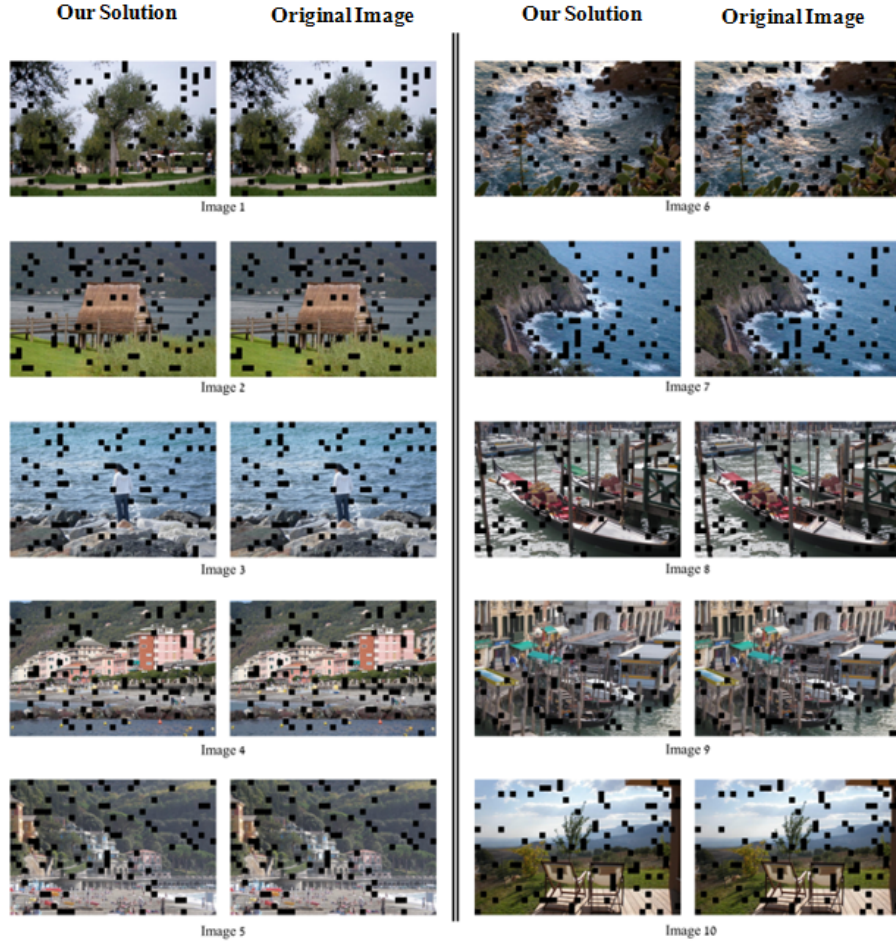

Figure 8. 10 puzzles out of 20 from the dataset of [17]

|         | Direct | Neighbor |          | Direct | Neighbor |
|---------|--------|----------|----------|--------|----------|
| Image 1 | 99.86% | 99.84%   | Image 6  | 100%   | 100%     |
| Image 2 | 99.59% | 99.84%   | Image 7  | 100%   | 100%     |
| Image 3 | 100%   | 100%     | Image 8  | 100%   | 100%     |
| Image 4 | 100%   | 100%     | Image 9  | 100%   | 100%     |
| Image 5 | 100%   | 100%     | Image 10 | 98.47% | 98.87%   |

**Puzzles of 805 Pieces, where about 15% of the pieces are missing**

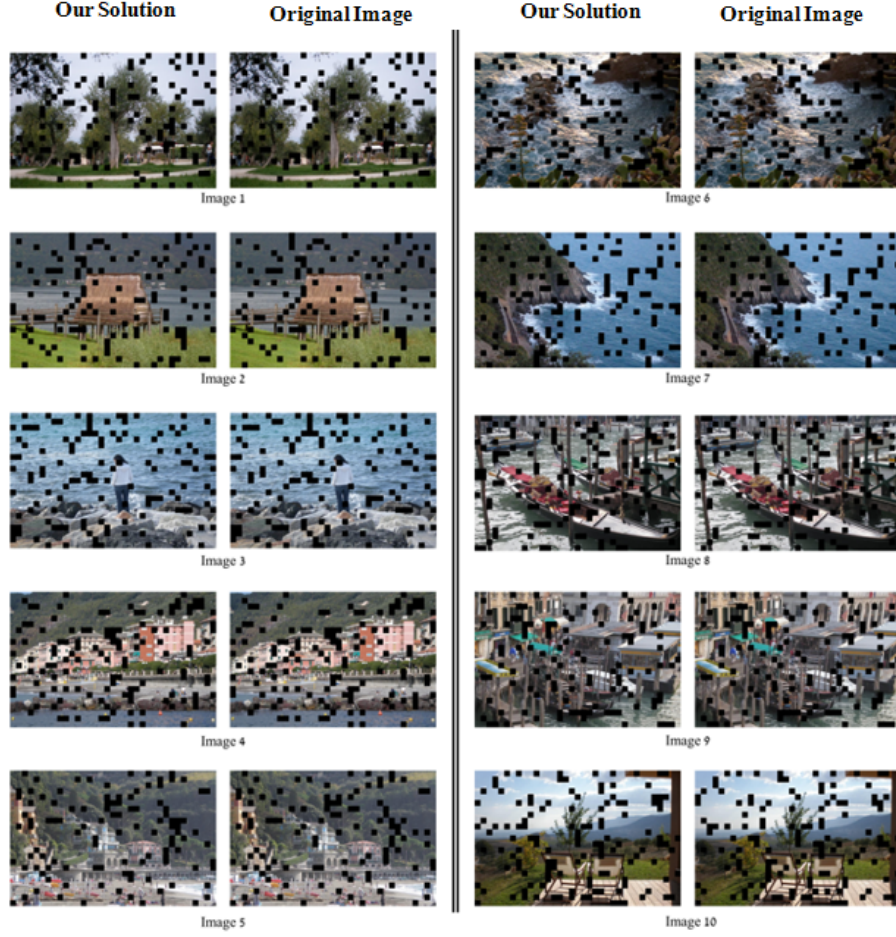

Figure 9. 10 puzzles out of 20 from the dataset of [17]

|         | Direct | Neighbor |          | Direct | Neighbor |
|---------|--------|----------|----------|--------|----------|
| Image 1 | 99.86% | 99.82%   | Image 6  | 100%   | 100%     |
| Image 2 | 99.56% | 99.73%   | Image 7  | 100%   | 100%     |
| Image 3 | 99.41% | 99.64%   | Image 8  | 99.12% | 98.75%   |
| Image 4 | 100%   | 100%     | Image 9  | 99.56% | 99.45%   |
| Image 5 | 99.43% | 99.41%   | Image 10 | 94.99% | 97.89%   |

**Puzzles of 2360 Pieces, where about 5% of the pieces are missing**

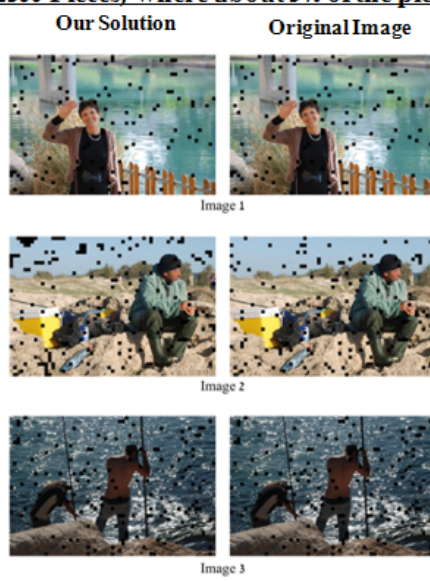

Figure 10. 3 puzzles out of 3 from the dataset of [17]

|         |        |        |
|---------|--------|--------|
| Image 1 | 99.55% | 99.42% |
| Image 2 | 84.17% | 88.09% |
| Image 3 | 100%   | 100%   |

**Puzzles of 2360 Pieces, where about 10% of the pieces are missing**

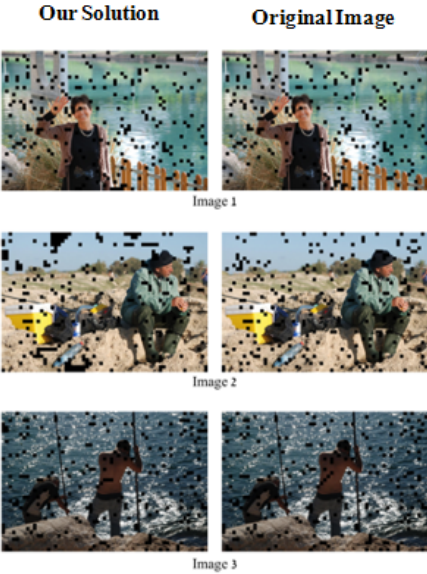

Figure 11. 3 puzzles out of 3 from the dataset of [17]

|         | Direct | Neighbor |
|---------|--------|----------|
| Image 1 | 99.62% | 99.65%   |
| Image 2 | 84.79% | 86.33%   |
| Image 3 | 99.49% | 99.6%    |

**Puzzles of 2360 Pieces, where about 15% of the pieces are missing**

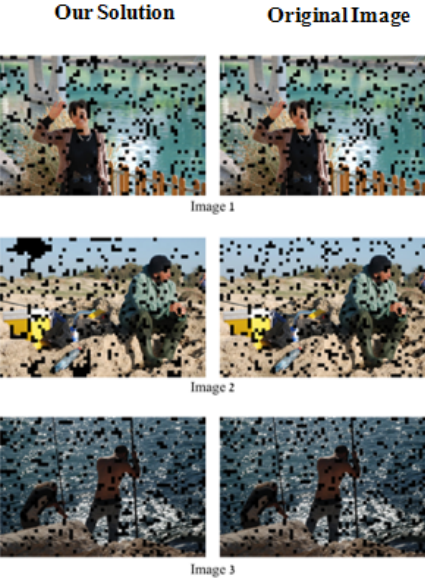

Figure 12. 3 puzzles out of 3 from the dataset of [17]

|         | Direct | Neighbor |
|---------|--------|----------|
| Image 1 | 99.36% | 99.44%   |
| Image 2 | 82.87% | 88.08%   |
| Image 3 | 98.4%  | 98.44%   |

**Puzzles of 3330 Pieces, where about 5% of the pieces are missing**

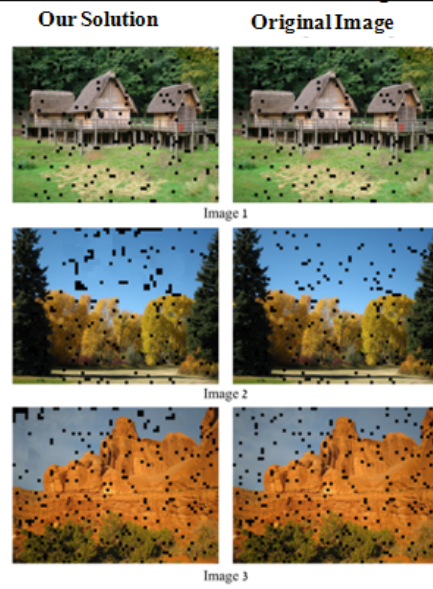

Figure 13. 3 puzzles out of 3 from the dataset of [17]

|         | Direct | Neighbor |
|---------|--------|----------|
| Image 1 | 100%   | 100%     |
| Image 2 | 78.46% | 87.56%   |
| Image 3 | 93.46% | 97.28%   |

**Puzzles of 3330 Pieces, where about 10% of the pieces are missing**

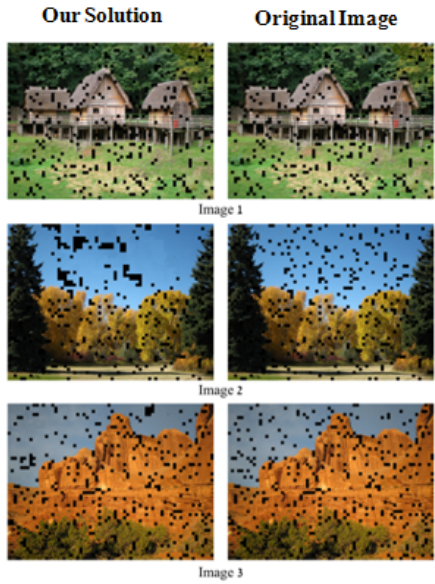

Figure 14. 3 puzzles out of 3 from the dataset of [17]

|         | Direct | Neighbor |
|---------|--------|----------|
| Image 1 | 100%   | 100%     |
| Image 2 | 78.24% | 88.49%   |
| Image 3 | 93.82% | 97.38%   |

**Puzzles of 3330 Pieces, where about 15% of the pieces are missing**

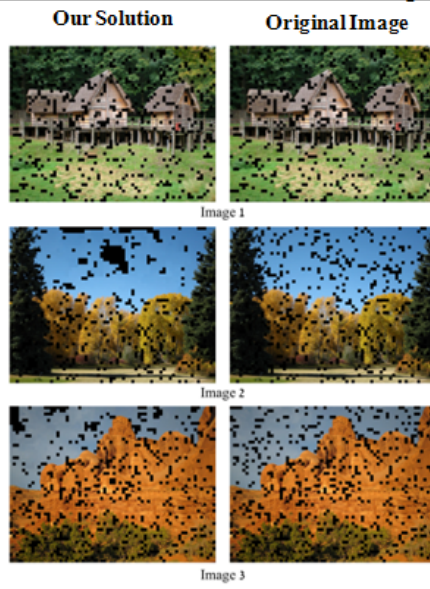

Figure 15. 3 puzzles out of 3 from the dataset of [17]

|         | Direct | Neighbor |
|---------|--------|----------|
| Image 1 | 99.93% | 99.89%   |
| Image 2 | 76.66% | 86.6%    |
| Image 3 | 90.97% | 96.84%   |

**Puzzles of 5015 Pieces, where about 5% of the pieces are missing**

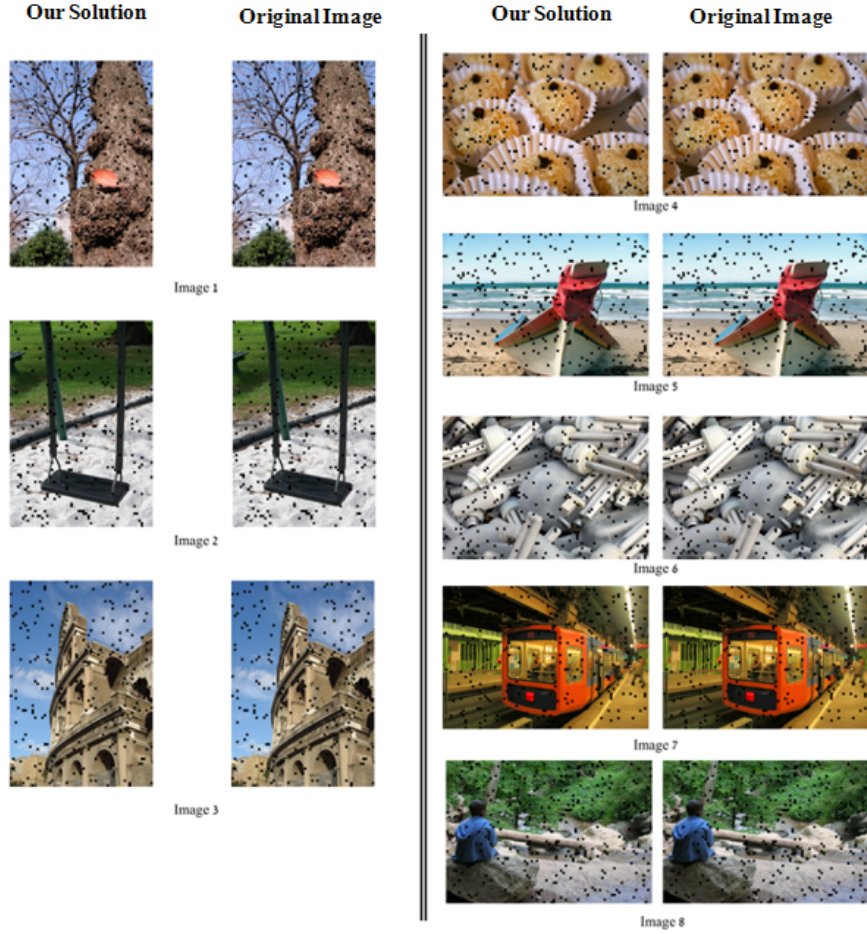

Figure 16. 8 puzzles out of 20 from the dataset of [19]

|         | Direct | Neighbor |         | Direct | Neighbor |
|---------|--------|----------|---------|--------|----------|
| Image 1 | 100%   | 100%     | Image 4 | 100%   | 100%     |
| Image 2 | 100%   | 100%     | Image 5 | 100%   | 100%     |
| Image 3 | 99.92% | 99.98%   | Image 6 | 100%   | 100%     |
|         |        |          | Image 7 | 99.92% | 99.88%   |
|         |        |          | Image 8 | 100%   | 100%     |

**Puzzles of 5015 Pieces, where about 10% of the pieces are missing**

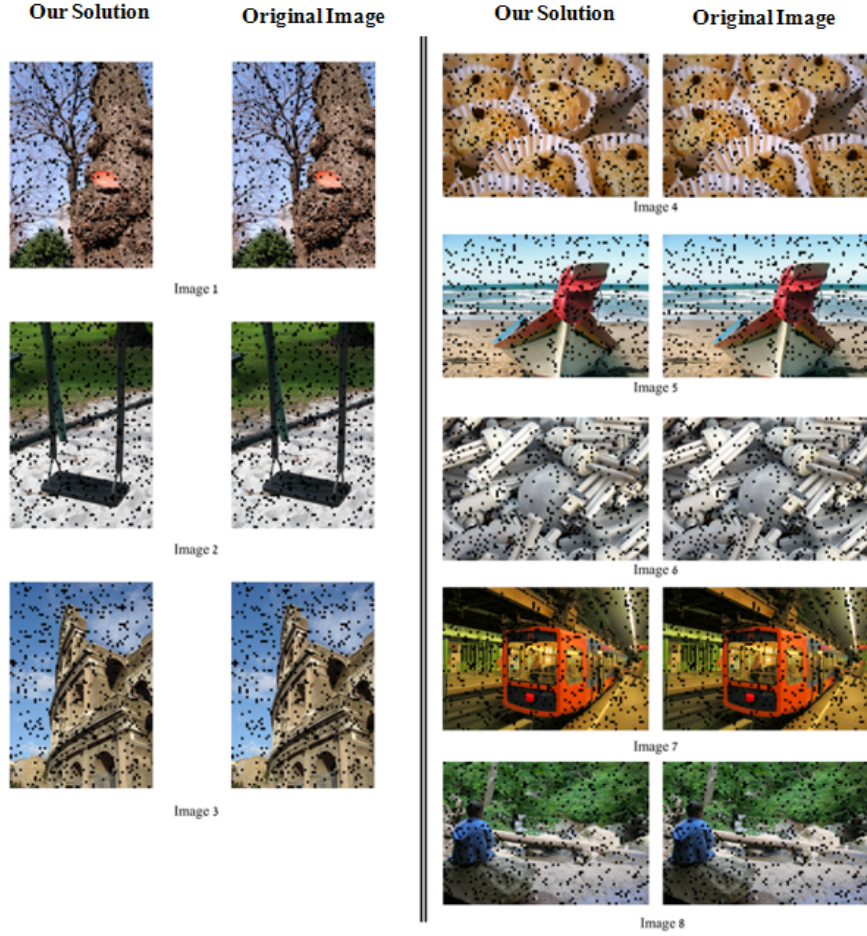

Figure 17. 8 puzzles out of 20 from the dataset of [19]

|         | Direct | Neighbor |         | Direct | Neighbor |
|---------|--------|----------|---------|--------|----------|
| Image 1 | 100%   | 100%     | Image 4 | 100%   | 100%     |
| Image 2 | 100%   | 100%     | Image 5 | 99.87% | 99.91%   |
| Image 3 | 99.93% | 99.96%   | Image 6 | 100%   | 100%     |
|         |        |          | Image 7 | 99.6%  | 99.52%   |
|         |        |          | Image 8 | 100%   | 100%     |

**Puzzles of 5015 Pieces, where about 15% of the pieces are missing**

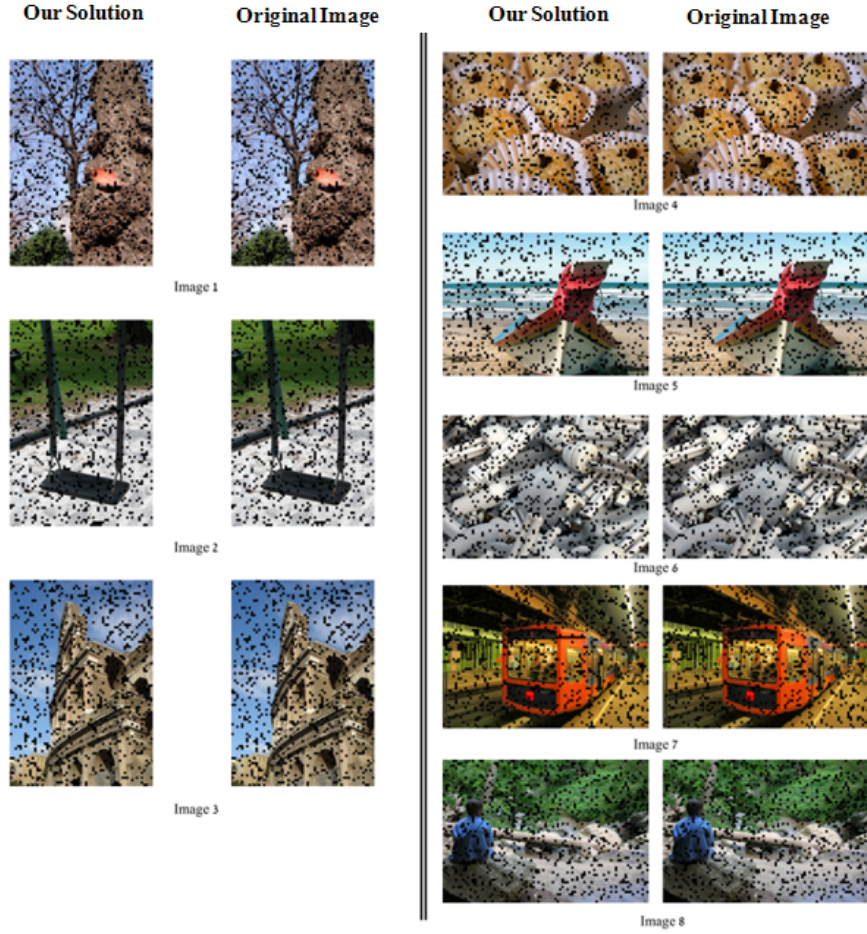

Figure 18. 8 puzzles out of 20 from the dataset of [19]

|         | Direct | Neighbor |         | Direct | Neighbor |
|---------|--------|----------|---------|--------|----------|
| Image 1 | 99.97% | 100%     | Image 4 | 100%   | 100%     |
| Image 2 | 99.79% | 99.94%   | Image 5 | 99.81% | 99.85%   |
| Image 3 | 99.41% | 99.49%   | Image 6 | 99.5%  | 100%     |
|         |        |          | Image 7 | 97.64% | 98.81%   |
|         |        |          | Image 8 | 99.98% | 99.99%   |

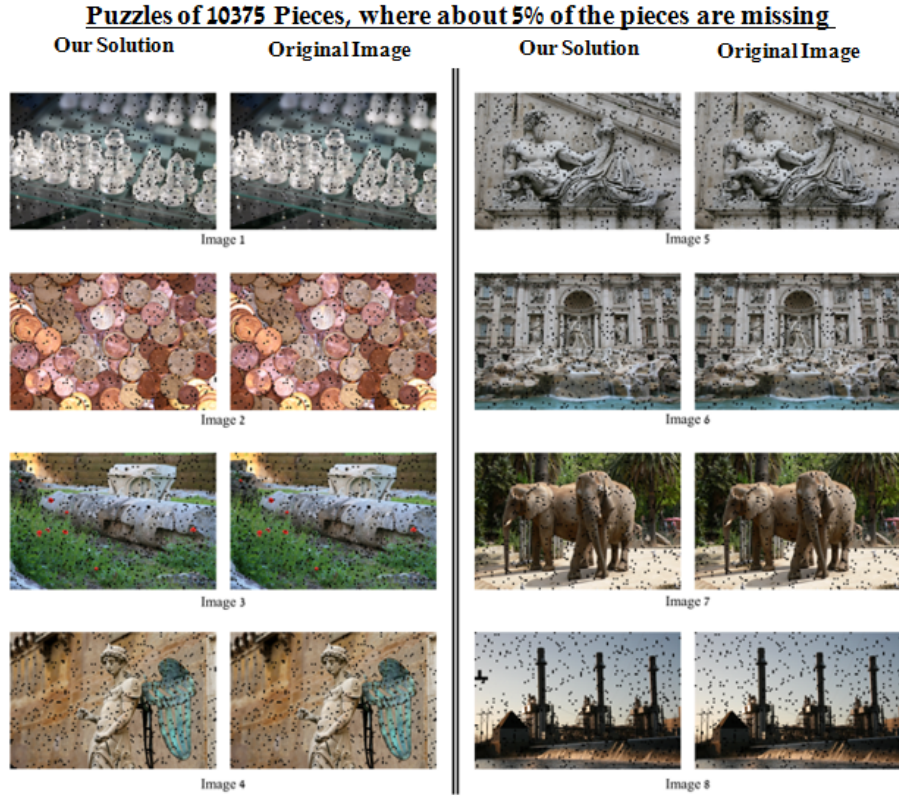

Figure 19. 8 puzzles out of 20 from the dataset of [19]

|         | Direct | Neighbor |         | Direct | Neighbor |
|---------|--------|----------|---------|--------|----------|
| Image 1 | 99.97% | 99.96%   | Image 5 | 99.96% | 99.94%   |
| Image 2 | 99.94% | 99.9%    | Image 6 | 99.99% | 99.99%   |
| Image 3 | 99.99% | 99.99%   | Image 7 | 100%   | 100%     |
| Image 4 | 99.75% | 99.67%   | Image 8 | 99.62% | 99.48%   |

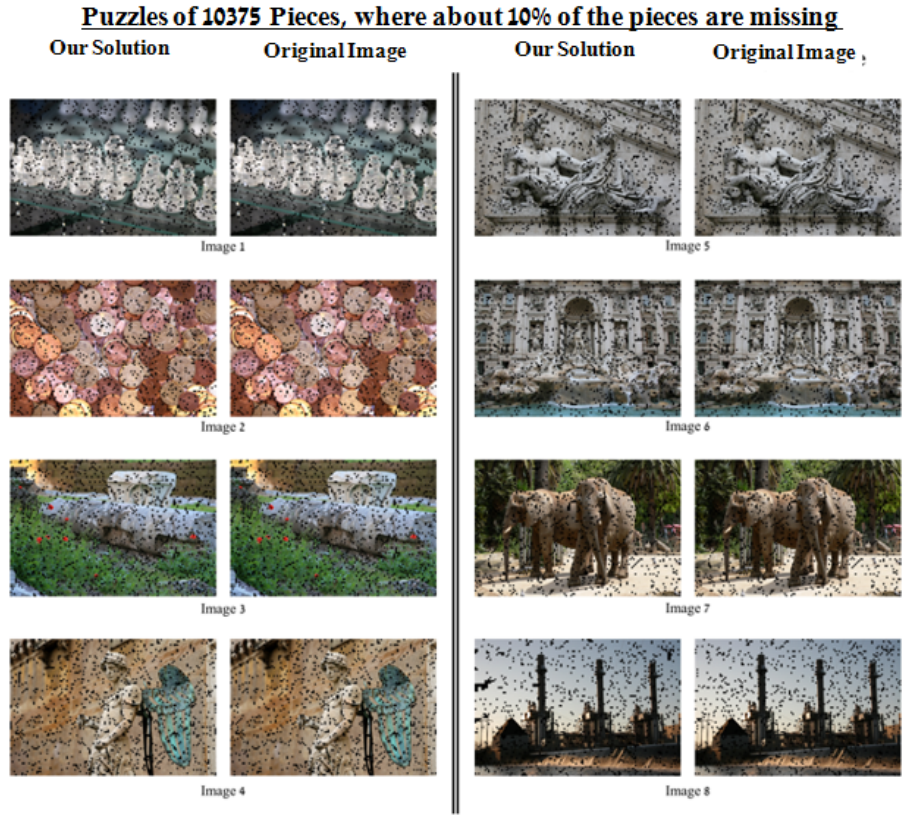

Figure 20. 8 puzzles out of 20 from the dataset of [19]

|         | Direct | Neighbor |         | Direct | Neighbor |
|---------|--------|----------|---------|--------|----------|
| Image 1 | 99.73% | 99.86%   | Image 5 | 99.97% | 99.99%   |
| Image 2 | 99.96% | 99.93%   | Image 6 | 99.82% | 99.86%   |
| Image 3 | 99.99% | 100%     | Image 7 | 99.95% | 99.99%   |
| Image 4 | 99.61% | 99.56%   | Image 8 | 98.74% | 98.88%   |

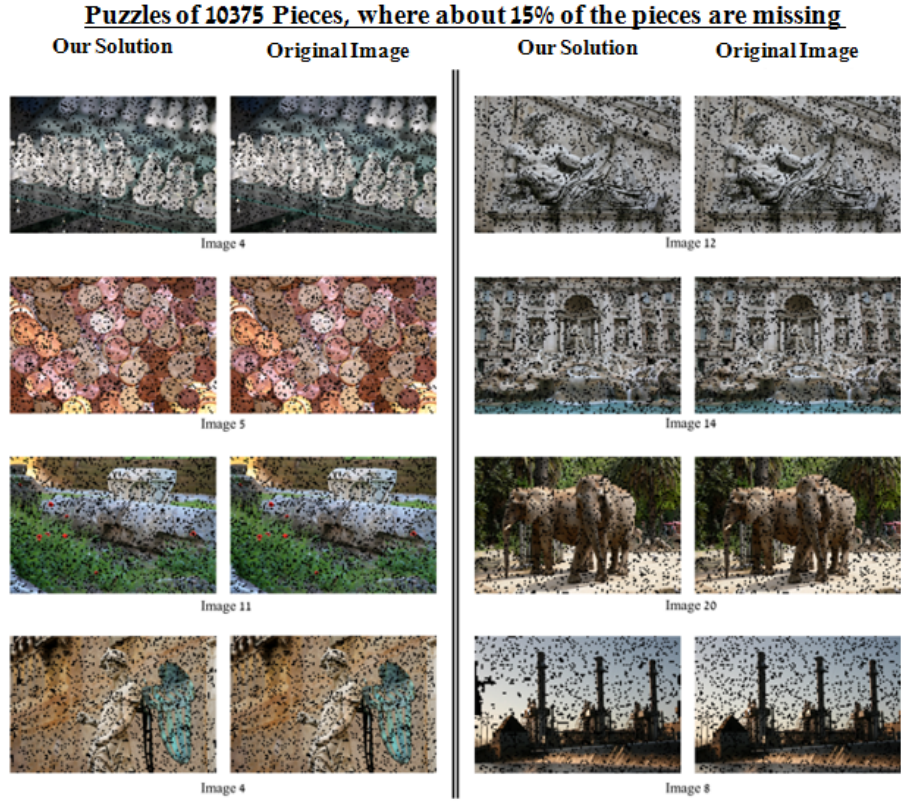

Figure 21. 8 puzzles out of 20 from the dataset of [19]

|         | Direct | Neighbor |         | Direct | Neighbor |
|---------|--------|----------|---------|--------|----------|
| Image 1 | 99.76% | 99.83%   | Image 5 | 99.85% | 99.93%   |
| Image 2 | 99.84% | 99.89%   | Image 6 | 99.28% | 99.45%   |
| Image 3 | 99.99% | 99.99%   | Image 7 | 99.85% | 99.95%   |
| Image 4 | 99.33% | 99.31%   | Image 8 | 96.87% | 97.62%   |

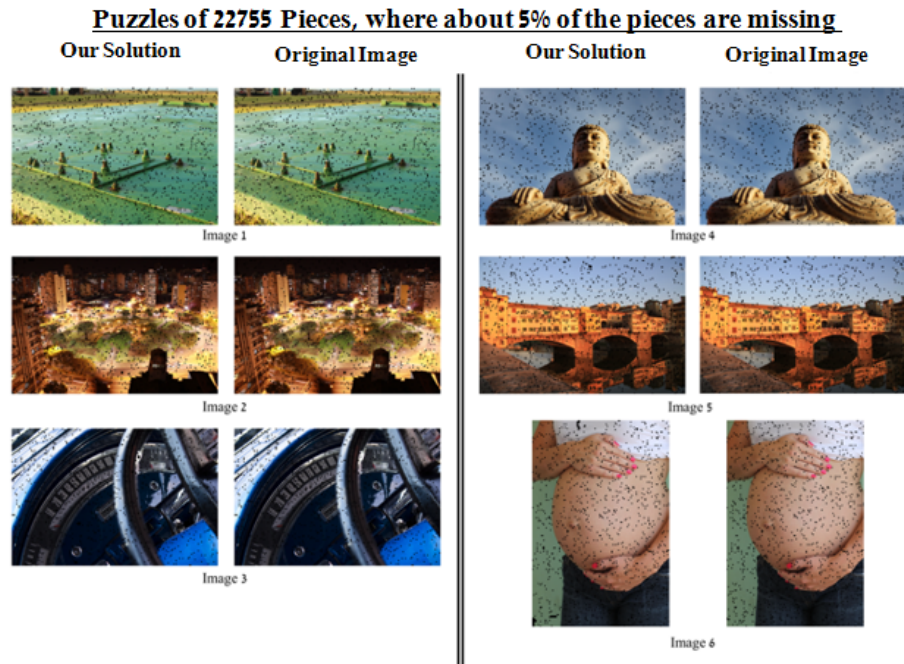

Figure 22. 6 puzzles out of 20 from the dataset of [19]

|         | Direct | Neighbor |         | Direct | Neighbor |
|---------|--------|----------|---------|--------|----------|
| Image 1 | 100%   | 100%     | Image 4 | 99.94% | 99.94%   |
| Image 2 | 98.51% | 98.85%   | Image 5 | 99.84% | 99.85%   |
| Image 3 | 99.73% | 99.66%   | Image 6 | 99.75% | 99.69%   |

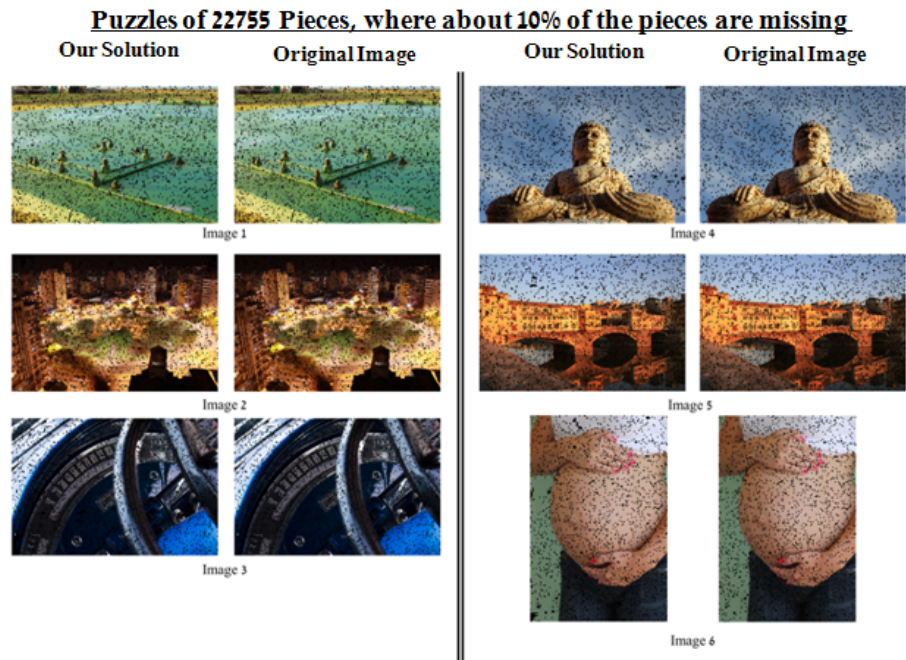

Figure 23. 6 puzzles out of 20 from the dataset of [19]

|         | Direct | Neighbor |         | Direct | Neighbor |
|---------|--------|----------|---------|--------|----------|
| Image 1 | 99.99% | 99.99%   | Image 4 | 99.69% | 99.7%    |
| Image 2 | 98.53% | 98.74%   | Image 5 | 99.41% | 99.49%   |
| Image 3 | 99.03% | 99%      | Image 6 | 99.48% | 99.45%   |

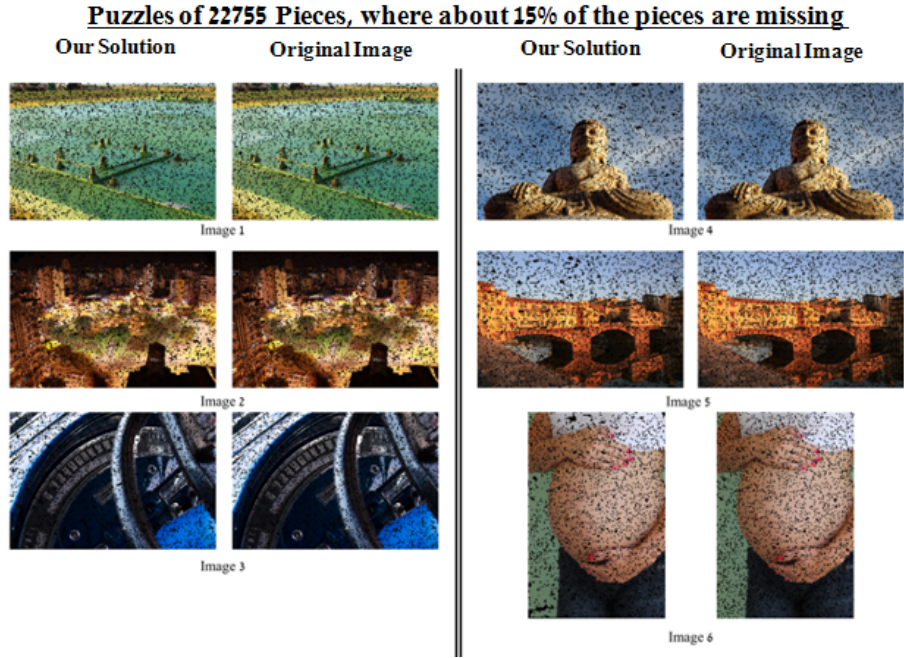

Figure 24. 6 puzzles out of 20 from the dataset of [19]

|         | Direct | Neighbor |         | Direct | Neighbor |
|---------|--------|----------|---------|--------|----------|
| Image 1 | 99.9%  | 99.95%   | Image 4 | 99.17% | 99.3%    |
| Image 2 | 97.19% | 97.8%    | Image 5 | 97.09% | 98.88%   |
| Image 3 | 96.59% | 98.2%    | Image 6 | 97.66% | 98.9%    |
