# Supplementary material
Source: ML conference proceedings conference paper supplement (https://openaccess.thecvf.com/content/cvpr_2015/html/Paikin_Solving_Multiple_Square_2015_CVPR_paper.html)
Supplement: Supplementary file 1 [file Paikin_Solving_Multiple_Square_2015_CVPR_supplemental.zip › Supplementary - Mixed.pdf]

# Solving Multiple Square Jigsaw Puzzles with Missing Pieces

## Supplementary Material - Multiple Puzzles with Mixed Pieces

Genady Paikin  
Technion  
genadyp28@gmail.com

Ayellet Tal  
Technion  
ayellet@ee.technion.ac.il

**Input:**

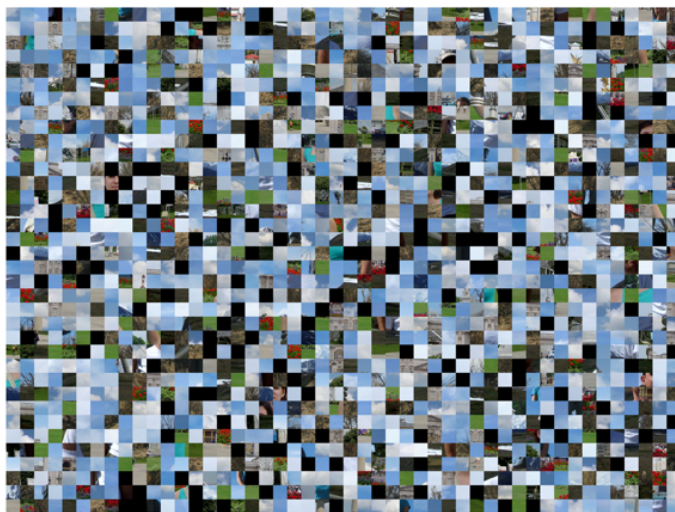

**Output:**

1569 pieces

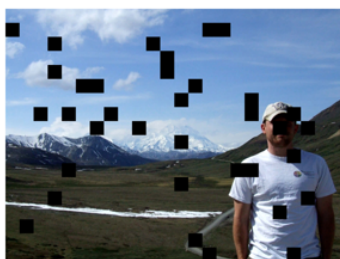

397 pieces

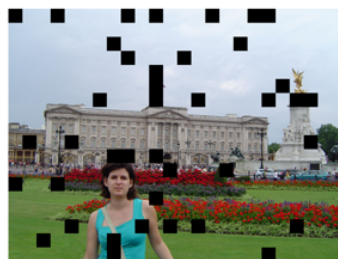

392 pieces

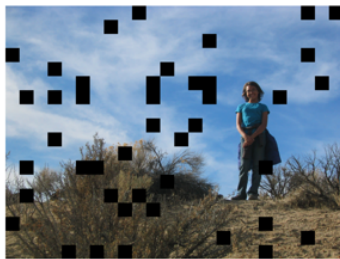

389 pieces

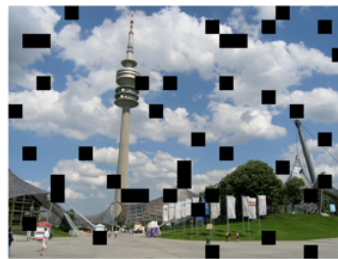

391 pieces

Figure 1. 4 puzzles, each with 432 pieces, from the dataset of [5]

**Input:**

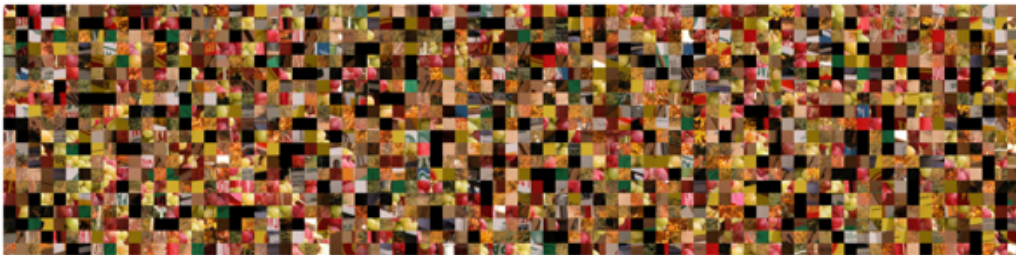

1471 pieces

**Output:**

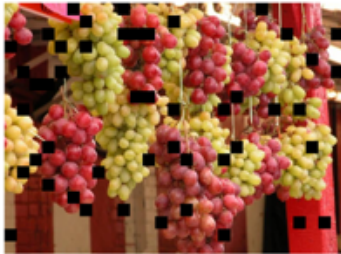

491 pieces

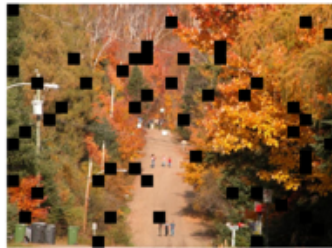

492 pieces

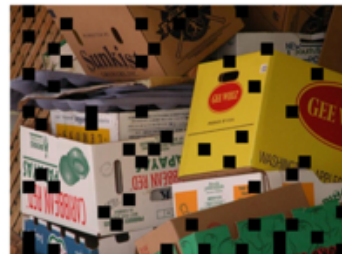

487 pieces

Figure 2. 3 puzzles, each with 540 pieces, from the dataset of [17]

**Input:**

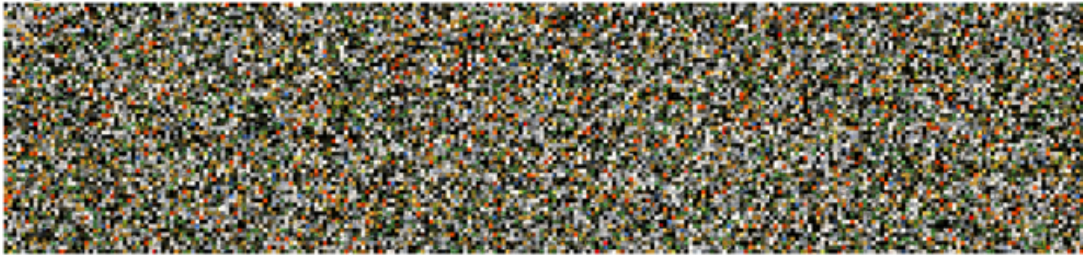

13584 pieces

**Output:**

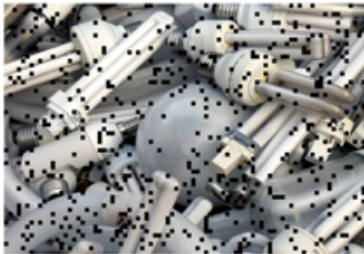

4322 pieces

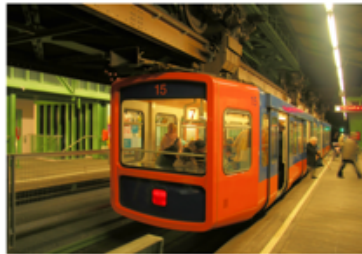

5015 pieces

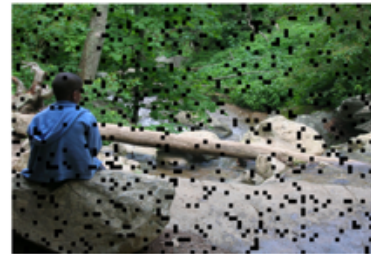

4517 pieces

Figure 3. 3 puzzles, each with 5015 pieces, from the dataset of [19]

**Input:**

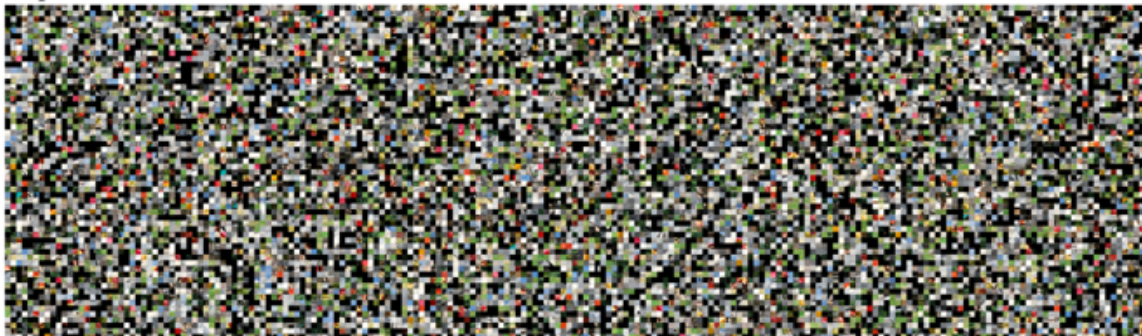

**Output:**

9091 pieces

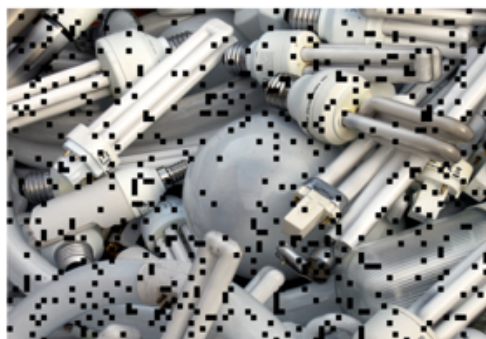

4322 pieces

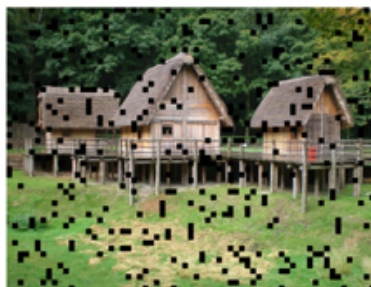

3018 pieces

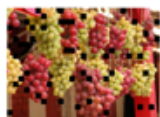

491 pieces

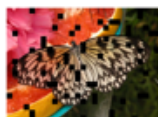

480 pieces

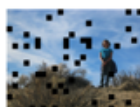

389 pieces

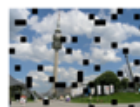

391 pieces

Figure 4. 6 puzzles whose pieces are mixed together: one with 5015 pieces from the dataset of [19], one with 3300 pieces from the dataset of [17], two with 540 pieces from the dataset of [17] and two with 432 pieces from the dataset of [5]

**Input:**

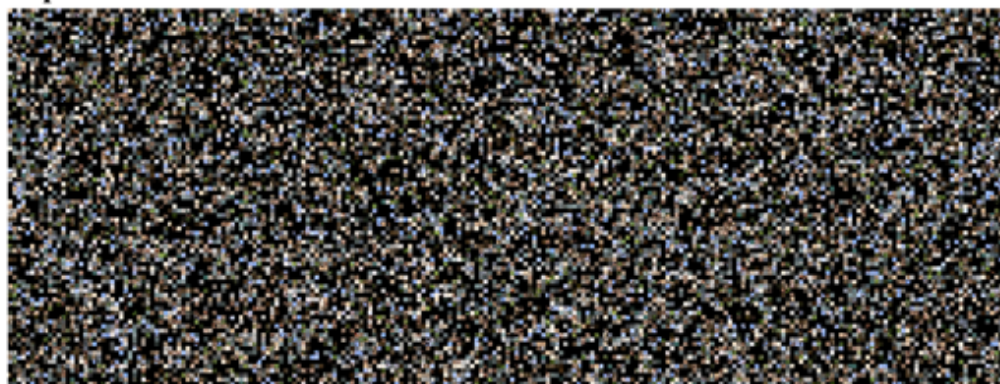

11010 pieces

**Output:**

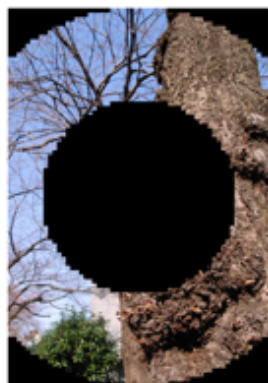

3074 pieces

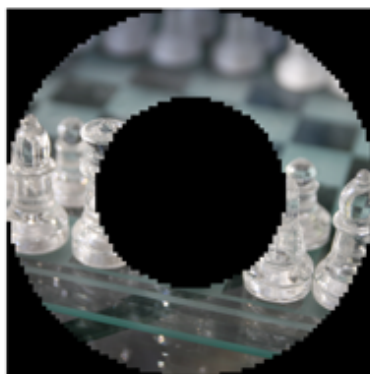

3968 pieces

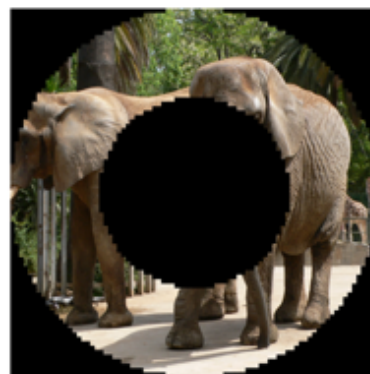

3968 pieces

Figure 5. 3 puzzles, each with 10375 pieces from the dataset of [19]

**Input:**

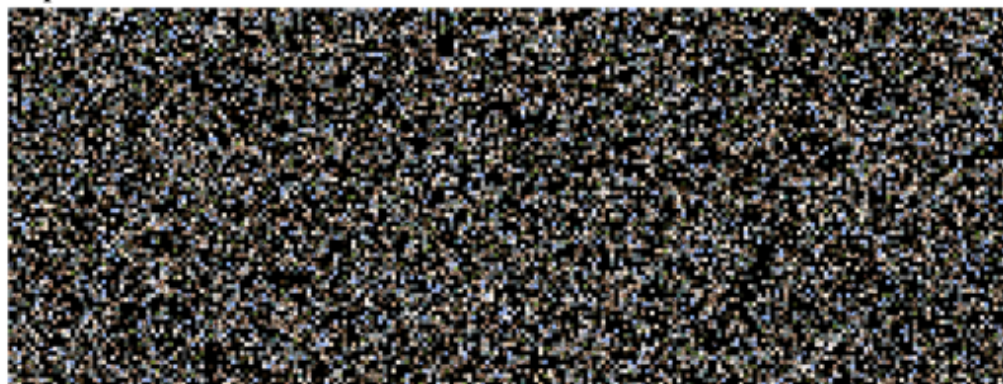

10349 pieces

**Output:**

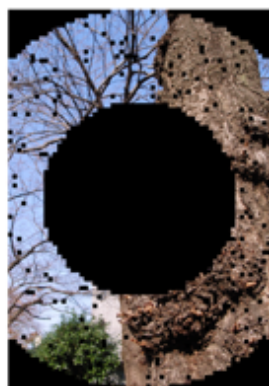

2889 pieces

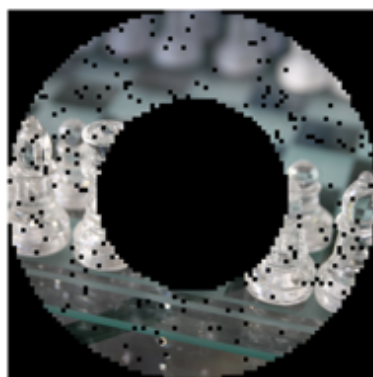

3729 pieces

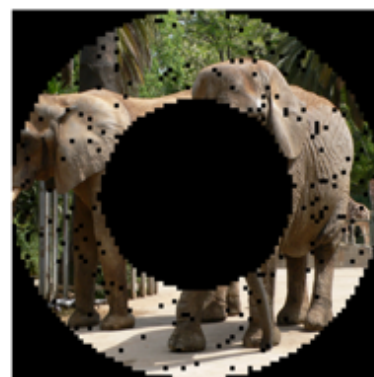

3731 pieces

Figure 6. 3 puzzles, each with 10375 pieces from the dataset of [19]

**Input:**

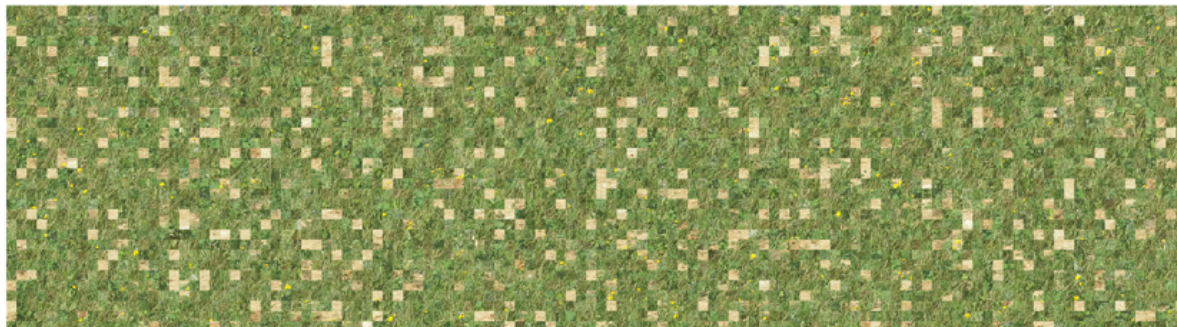

3712 pieces

**Output:**

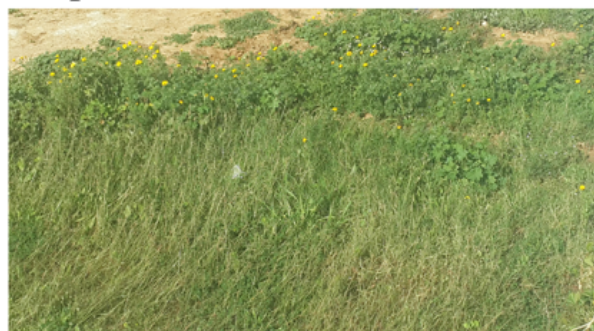

1856 pieces

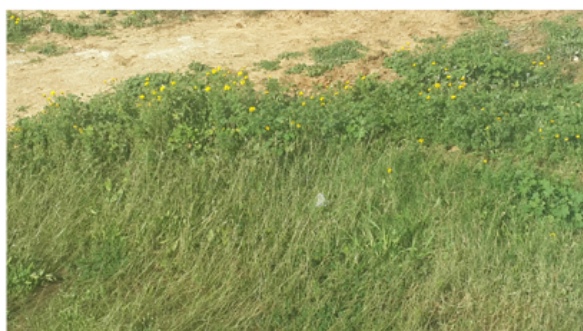

1856 pieces

Figure 7. 2 puzzles, each with 1856 pieces

**Input:**

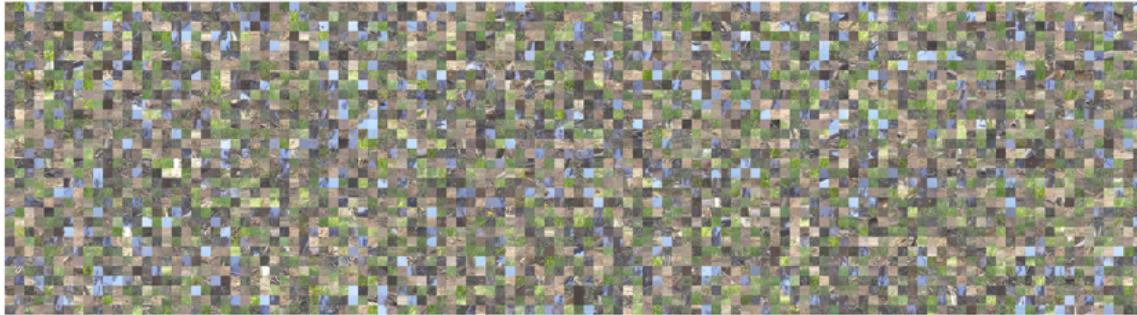

3712 pieces

**Output:**

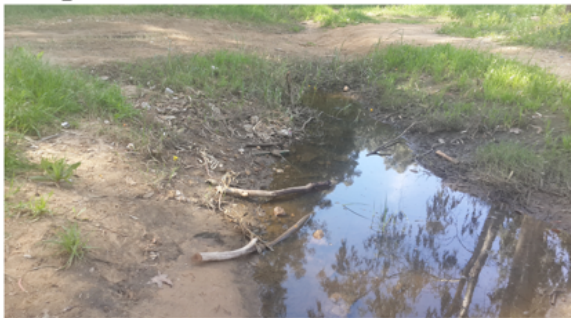

1856 pieces

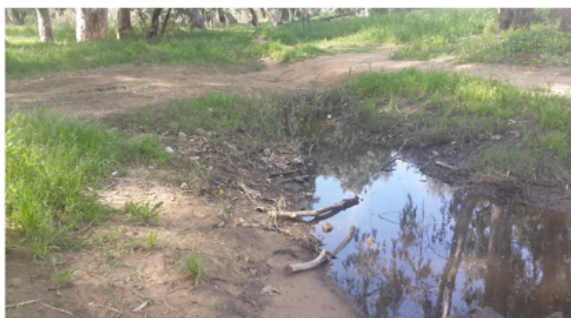

1856 pieces

Figure 8. 2 puzzles, each with 1856 pieces
